# Supplementary material for: Regulation of Dietary Protein Solubility Improves Ruminal Nitrogen Metabolism In Vitro: Role of Bacteria–Protozoa Interactions
Source: MDPI journal article supplement (doi:10.3390/nu14142972), 2022-07-20
Supplement: s1 [file s1]

**Table S1.** Protein fractions of the feed samples.

| Items             | Protein fractions (Mean, n=3) |                       |                        |
|-------------------|-------------------------------|-----------------------|------------------------|
|                   | CP <sup>1</sup> %             | SP <sup>2</sup> (%CP) | ISP <sup>3</sup> (%CP) |
| Rice straw        | 8.2                           | 20.4                  | 79.6                   |
| Corn              | 8                             | 24.3                  | 75.7                   |
| Soybean meal      | 46.9                          | 35.9                  | 64.1                   |
| Wheat bran        | 15.4                          | 33.7                  | 66.3                   |
| Corn protein meal | 65.5                          | 6.4                   | 93.6                   |
| Urea              | 281                           | 100                   | 0                      |

<sup>1</sup>CP = crude protein;

<sup>2</sup>SP = soluble protein;

<sup>3</sup>ISP = insoluble protein.

**Table S2.** Trend analysis of each treatment's NH<sub>3</sub>-N content at different time points *in vitro*.

| Sampling<br>Time/h | Treatment          |                    |                     |                    | SEM   | P-Value |        |       |
|--------------------|--------------------|--------------------|---------------------|--------------------|-------|---------|--------|-------|
|                    | S20                | S30                | S40                 | S50                |       | T       | L      | Q     |
| 2                  | 18.65              | 17.52              | 17.21               | 19.24              | 0.409 | 0.274   | 0.684  | 0.072 |
| 4                  | 11.79 <sup>b</sup> | 12.17 <sup>b</sup> | 12.66 <sup>b</sup>  | 20.96 <sup>a</sup> | 1.203 | <0.001  | <0.001 | 0.002 |
| 8                  | 11.82              | 10.93              | 12.65               | 13.78              | 0.575 | 0.385   | 0.170  | 0.398 |
| 12                 | 11.67 <sup>c</sup> | 12.26 <sup>c</sup> | 14.48 <sup>b</sup>  | 19.16 <sup>a</sup> | 1.130 | 0.044   | 0.012  | 0.247 |
| 24                 | 15.61 <sup>c</sup> | 15.85 <sup>c</sup> | 16.20 <sup>bc</sup> | 20.45 <sup>a</sup> | 0.743 | 0.021   | 0.046  | 0.061 |

a-c values with different superscripts differ significantly at  $p \leq 0.05$  among SP treatments.

Treatments: S20, S30, S40 and S50 are ~14% CP, SP proportion (% of CP) 20, 30, 40 and 50 respectively; SEM: standard error of the mean; T: Treatment; L: linear; Q: quadratic.
